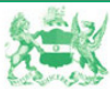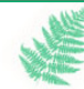

## Histolocalization of chemotaxonomic markers in Brazilian Vernonieae (Asteraceae)

MAKELI G. LUSA<sup>1,2\*</sup>, FERNANDO B. DA COSTA<sup>3</sup> and BEATRIZ APPEZZATO-DA-GLÓRIA<sup>1</sup>

<sup>1</sup>Departamento de Ciências Biológicas, Escola Superior de Agricultura 'Luiz de Queiroz', Universidade de São Paulo, Piracicaba, São Paulo 13418-900, Brazil

<sup>2</sup>Plant Biology Postgraduate, Instituto de Biologia, Universidade Estadual de Campinas, CP 6109, Campinas, São Paulo 13083-970, Brazil

<sup>3</sup>Faculdade de Ciências Farmacêuticas de Ribeirão Preto, Universidade de São Paulo, 14040-903 Ribeirão Preto -SP, Brazil

Received 1 June 2015; revised 27 February 2016; accepted for publication 23 July 2016

Vernonieae are well represented in South America by subtribe Lychnophorinae, with 104 Brazilian species, some of them rare and endangered. Lychnophorinae are well known for producing metabolites of high pharmaceutical and chemotaxonomic value. Despite the importance of secondary metabolites in Lychnophorinae, there is still little evidence regarding the secretory structures responsible for producing these compounds. Therefore, in this study we investigated 15 species representative of the main lineages of Lychnophorinae, with the following objectives: to identify where the chemotaxonomic markers of Lychnophorinae are secreted and stored and in which developmental stage of the organ these metabolites are found. Samples of stems and leaves were processed according to the usual techniques in plant anatomy. It was found that the main sites of secondary metabolite biosynthesis are glandular trichomes, epidermal cells and parenchyma tissues. Metabolites from glandular trichomes, especially sesquiterpene lactones (STL), are prevalent in the early developmental stages of organs. The metabolite compounds stored in parenchyma tissues are mainly terpenoids, flavonoids and other phenolic compounds; young and expanded leaves are equally rich in metabolites. Thus, the information obtained in this study is essential for conducting chemotaxonomic studies in this group, helping to promote selective collection and conservation of species. © 2016 The Linnean Society of London, *Botanical Journal of the Linnean Society*, 2016, 182, 581–593

**ADDITIONAL KEYWORDS:** epidermal cells – flavonoids – glandular trichomes – histochemistry – parenchyma tissues – secretory endodermis – sesquiterpene lactones.

### INTRODUCTION

Asteraceae include many species of economic interest, many of these are used therapeutically, and consequently their morphology and anatomy have been studied, including the structures responsible for the production, storage and secretion of secondary metabolic compounds (Werker & Fahn, 1981; Ascensão & Pais, 1987; Figueiredo & Pais, 1994; Ascensão *et al.*, 2001; Andreucci *et al.*, 2008; Camilotti *et al.*, 2014). These secretory structures in Asteraceae take the form of glandular trichomes, canals, cavities, laticifers, idioblasts, hydathodes and glandular

appendices (Metcalf & Chalk, 1950; Carlquist, 1958; Lester & Curtis, 1985; Castro, Leitão Filho & Monteiro, 1997). In the tribe Vernonieae, glandular trichomes, idioblasts, cavities and secretory channels have all been described (Castro *et al.*, 1997; Appezzato-da-Glória *et al.*, 2008; Favi *et al.*, 2008; Cury & Appezzato-da-Glória, 2009; Appezzato-da-Glória *et al.*, 2012), although the presence of secretory endodermis is less frequently reported (Luque, Menezes & Semir, 1997; Appezzato-da-Glória *et al.*, 2008).

Lychnophorinae are one of the most representative subtribes of Vernonieae in Brazil (Keeley & Robinson, 2009), comprising 18 genera and 104 species including shrubs, subshrubs, trees and treelets, which are nearly all restricted to the Cerrado

\*Corresponding author. E-mail: makelilus@yahoo.com.br

Domain, occurring predominantly in campos rupes- tres (Loeuille *et al.*, 2015a) and exhibiting morpho- logical and anatomical adaptations to these arid zones (Lusa *et al.*, 2014, 2015). Findings of recent phylogenetic analysis for Lychnophorinae based on molecular and morphological data show that the sub- tribe is monophyletic (Loeuille, Keeley & Pirani, 2015b). However, questions remain concerning the relationships of some taxa in this phylogenetic hypothesis and additional characteristics, such as chemical and morphological data, may prove useful for a better understanding of the evolution of the group.

It is well known that Lychnophorinae produce metabolites of therapeutic importance, such as ter- penoids (mono-, sesqui-, di- and triterpenes and sesquiterpene lactones) and phenolic compounds (fla- vonoids and cinnamic acid derivatives) (Vichnewski & Gilbert, 1972; Vichnewski *et al.*, 1976; Herz *et al.*, 1980; Dias Barros *et al.*, 1985; Oliveira *et al.*, 1996; Graef *et al.*, 2000; Dos Santos *et al.*, 2005; Kanashiro *et al.*, 2006; Taleb-Contini *et al.*, 2008; Silvério *et al.*, 2008; Keles *et al.*, 2010; Dos Santos *et al.*, 2010; Bal- din *et al.*, 2012; De Souza *et al.*, 2012; Abreu *et al.*, 2013; Silvério *et al.*, 2013; Gouvea *et al.*, 2014; Saúde-Guimarães, Raslan & Oliveira, 2014). In addi- tion, many studies have investigated the chemotax- onomy of Lychnophorinae because of the chemical richness that characterizes the subtribe (Bohlmann *et al.*, 1980a, b; Herz *et al.*, 1980; Bohlmann *et al.*, 1981; Zdero *et al.*, 1981; Bohlmann *et al.*, 1982; Bohl- mann & Jakupovic, 1990; Borella *et al.*, 1992; Lunar- dello *et al.*, 1995; Borella *et al.*, 1998; Vichnewski *et al.*, 1999; Sacilotto, Sartori & Vichnewski, 2002; Sartori *et al.*, 2002; Sakamoto *et al.*, 2003, 2005; Keles *et al.*, 2010; Sakamoto *et al.*, 2010; Souza *et al.*, 2012; Lusa *et al.*, 2016). In regard to the secre- tory structures of Lychnophorinae, the presence of glandular trichomes has been reported by Luque, Menezes & Semir (1999) in leaves and by Luque & Menezes (2003) in stems of *Lychnophora* Mart. *s.l.* Silva *et al.* (2014) recently reported the presence of flavonoid metabolites in palisade parenchyma cells in the leaves of six *Lychnophora* spp. Despite these efforts, the secretion sites of the major classes of sec- ondary metabolites for the group are not well estab- lished, especially in view of its new circumscription (Loeuille *et al.*, 2015b).

Many species of Lychnophorinae are endemic with small populations and 15 species considered rare (Nakajima *et al.*, 2009). Due to the peculiar environmental conditions under which most species of the subtribe live (Lusa *et al.*, 2014), their restricted distribution and the destruction of natu- ral habitats, 46 species of Lychnophorinae are endangered (Nakajima, Dematteis & Loeuille,

2013). This situation must be taken into account when planning to collect biological material, espe- cially for endangered species. With the advent of new and modern analytical (Marston, 2007) and spectrophotometric techniques (Eisenreich & Bacher, 2007) for phytochemical studies, much less plant material is required for compound isolation and substance identification (Sumner, Mendes & Dixon, 2003). If the research focuses on the detec- tion of substances located in specific sites (tri- chomes, organs, secretions etc.), the amount of biological material required is even smaller, as lit- tle as a few grams or milligrams (Sumner *et al.*, 2003; Allwood & Goodacre, 2010; Chagas-Paula *et al.*, 2015). To implement these new approaches, it is essential to have exact knowledge of the struc- tures in which the compounds of interest are secreted or stored and in which organ and at which developmental stage of the organ the key substances are accumulated. In this study, we investigated 15 species of Lychnophorinae represen- tative of the main lineages in the group (Loeuille *et al.*, 2015b). The main objectives were to verify where the main secondary metabolites or chemo- taxonomic markers of Lychnophorinae are secreted and stored and to determine at which developmen- tal stage of the organ these substances are found.

## MATERIAL AND METHODS

The plant material analyzed was collected in the states of Minas Gerais and Bahia, Brazil (Table 1). Vouchers were deposited at the Universidade de São Paulo Herbarium (SPF) (Table 1). Samples of stems (from apical to woody regions in early thickening stages) and young and fully expanded leaves were collected from adult plants.

### MICROMORPHOLOGICAL CHARACTERIZATION

For structural analyses, samples were fixed in Kar- novsky solution (Karnovsky, 1965; modified to incor- porate phosphate buffer pH 7.2), subjected to vacuum conditions to remove the air in the tissues, dehydrated using ethyl alcohol and infiltrated with plastic resin hydroxyethyl methacrylate (Leica His- toresin; Heraeus Kulzer, Hanau, Germany) according to the manufacturer's instructions. The samples were sectioned at 5–7 µm thickness using a rotary micro- tome (Model RM 2245; Leica Microsystems Nussloch GmbH, Nussloch, Germany) and then stained with 0.05% toluidine blue in citrate-phosphate buffer, pH 4.5 (Sakai, 1973), and mounted in Entellan synthetic resin (Merck, Darmstadt, Germany). In addition, fresh material from all species was cut with a razor

**Table 1.** Plant material used in this study

| Species                                                   | Locality                     | Geographic coordinates    | Elevation (m) | Voucher                    |
|-----------------------------------------------------------|------------------------------|---------------------------|---------------|----------------------------|
| <i>Anteremanthus hatschbachii</i> H. Rob.                 | Grão Mogol, MG               | S16°35'37.6" W42°54'07.7" | 673           | Loeuille <i>et al.</i> 533 |
| <i>Blanchetia heterotricha</i> DC.                        | Dom Macedo Costa, BA         | S12°54'11.1" W39°12'06.6" | 193           | Loeuille <i>et al.</i> 680 |
| <i>Chronopappus bifrons</i> DC.                           | Santo Antônio do Itambé, MG  | S18°23'49.9" W43°21'21.0" | 1819          | Lusa <i>et al.</i> 63      |
| <i>Eremanthus leucodendron</i> Mattf.                     | Rio de Contas, BA            | S13°31'29" W41°57'39.9"   | 1691          | Loeuille <i>et al.</i> 669 |
| <i>Eremanthus polycephalus</i> (DC.) MacLeish             | Diamantina, MG               | S18°11'52.0" W43°37'33.0" | 1141          | Loeuille <i>et al.</i> 531 |
| <i>Heterocoma gracilis</i> Loeuille, J.N. Nakaj. & Semir. | São Gonçalo do Rio Preto, MG | S18°07'42.1" W43°22'40.5" | 1039          | Lusa <i>et al.</i> 61      |
| <i>Lychnophora diamantinana</i> Coile & S.B. Jones        | Diamantina, MG               | S18°11'52.5" W43°37'33.1" | 1141          | Loeuille <i>et al.</i> 530 |
| <i>Lychnophora granmogolensis</i> (Duarte) D.J.N. Hind    | Mucugê, MG                   | S12°59'52.7" W41°20'41.2" | 924           | Loeuille <i>et al.</i> 665 |
| <i>Lychnophora santosii</i> H. Rob.                       | Rio de Contas, BA            | S13°31'27.8" W41°57'40.3" | 1693          | Loeuille <i>et al.</i> 668 |
| <i>Lychnophora tomentosa</i> Sch. Bip.                    | Diamantina, MG               | S18°12'52.9" W43°35'44.1" | 1362          | Loeuille <i>et al.</i> 528 |
| <i>Lychnophora triflora</i> (Mattf.) H. Rob.              | Palmeiras, BA                | S12°27'25.5" W41°28'17.3" | 1092          | Loeuille <i>et al.</i> 658 |
| <i>Minasia scapigera</i> H. Rob.                          | Diamantina, MG               | S18°12'52.9" W43°35'44.1" | 1362          | Loeuille <i>et al.</i> 529 |
| <i>Paralychnophora bicolor</i> (DC.) MacLeish             | Rio de Contas, BA            | S13°31'33.7" W41°57'56.7" | 1876          | Loeuille <i>et al.</i> 672 |
| <i>Piptolepis monticola</i> Loeuille                      | Santo Antônio do Itambé, MG  | S18°23'53.8" W43°19'33.0" | 1630          | Lusa <i>et al.</i> 62      |
| <i>Prestelia eriopus</i> Sch. Bip.                        | Santana do Riacho, MG        | S19°17'28.1" W43°36'01.5" | 1131          | Loeuille <i>et al.</i> 524 |

blade or sliding microtome (Model SM 2000R; Leica Microsystems Nussloch GmbH).

#### HISTOCHEMICAL REACTIONS

Histochemical reactions were chosen based on the chemical classes of higher occurrence in Lychnophorinae (Keles *et al.*, 2010) and were performed on fresh material and/or material embedded in plastic resin. The following chemical reactions on fresh material were carried out immediately after collection: Sudan IV (Jensen, 1962) and neutral red under fluorescence (blue excitation filter, 450–490 bandpass filter) (Kirk, 1970) for lipophilic compounds; NADI reagent (David & Carde, 1964) for terpenoids; sulphuric acid (Geissman & Griffin, 1971) for STL terpenoids; ferric chloride 3% (Johansen, 1940) for phenolic compounds; and aluminum chloride under induced fluorescence (UV excitation filter, 340–380 bandpass filter) (Charrière-Ladreix, 1976) for flavonoid phenolic compounds. The sections were examined immediately after each reaction. Two histochemical tests were used for lipophilic substances, because different reactions occurred in the same tissue when both tests were used. For the tests conducted under fluorescence, the sections were

observed under a microscope (Model DM LB; Leica Microsystems Wetzlar GmbH, Wetzlar, Germany) in UV light produced by an HBO 100 W mercury vapour lamp. Control sections were subjected simultaneously to the histochemical tests, in accordance with standard procedure. Untreated sections were assembled and observed to investigate the natural appearance of the organs and secretions.

On the material embedded in plastic resin, tests using 3% ferric chloride (Johansen, 1940), Sudan IV (Jensen, 1962) and NADI reagent (David & Carde, 1964) were performed. The results were documented by capturing images from the sections, using a video camera (Modelo DC 300F; Leica Microsystems (Schweiz) AG, Heerbrugg, Switzerland) coupled to the microscope previously cited.

## RESULTS

#### HISTOCHEMICAL IDENTIFICATION OF SECRETION PHASES IN LEAVES AND STEMS

Histochemical tests showed that the secondary metabolites related to the main chemotaxonomic markers of Lychnophorinae are secreted and accumulated in leaf and stem glandular trichomes and



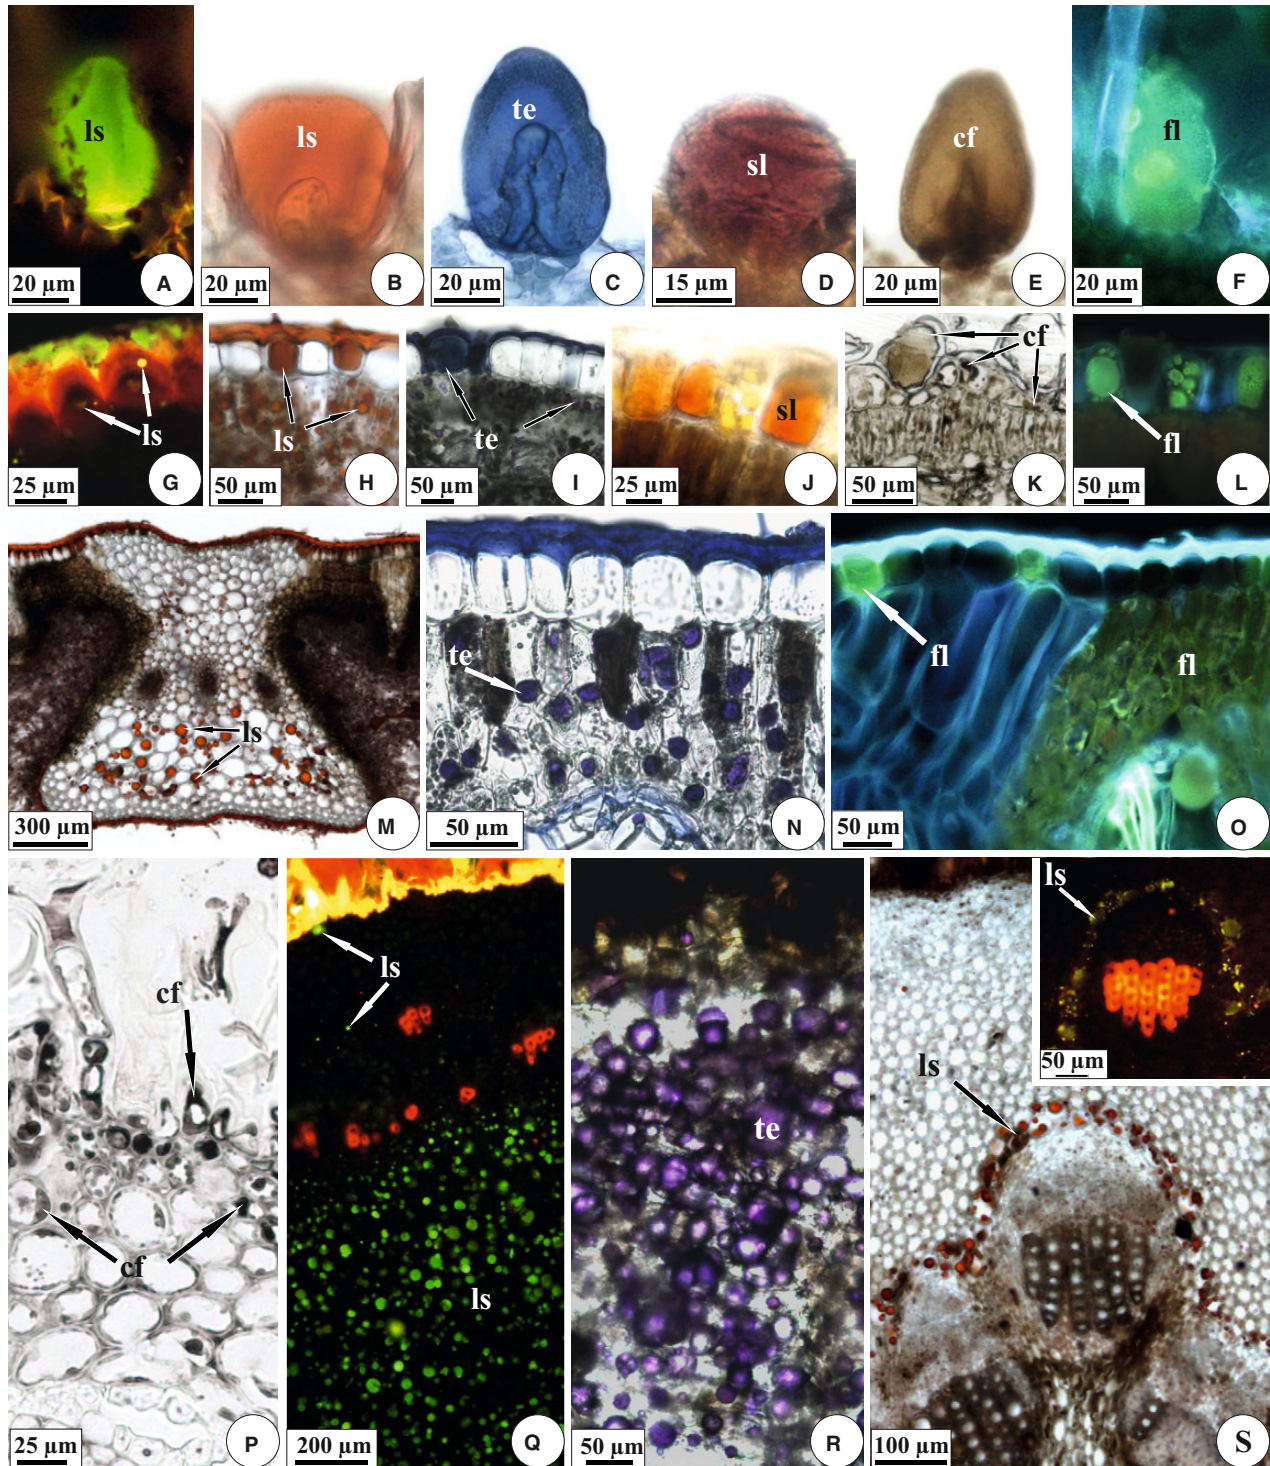

epidermal cells (Fig. 1A–L), in the palisade and spongy parenchyma (chlorenchymal cells) and ground parenchyma of the leaf midvein (Fig. 1K, M–O) and in the cortical, medullar and phloem parenchyma and secretory endodermis in stems (Fig. 1P–S).

The histochemical tests performed on leaves and stems, classes of compounds detected, and secretion sites in the species evaluated are indicated in Tables 2 and 3. In general, lipophilic compounds are correlated with the occurrence of terpenoids, i.e.

**Figure 1.** Histochemical reactions in cross-sections of leaves and stems of Lychnophorinae. A, F, G, L, O, Q, T, fluorescence microscopy. B–E, H–K, M, N, P, R, S, light microscopy. A, F, S, *Anteremanthus hatschbachii*; B, L, *Lychnophora santosii*; D, N, *Chronopappus bifrons*; C, E, J, *L. diamantinana*; G, *L. granmogolensis*; H, M, O, R, *Prestelia eriopus*; I, *L. triflora*; K, P, *Eremanthus polycephalus*. Q, *Piptolepis monticola*. A–F, Glandular trichomes. G–L, epidermal cells of leaves. K, N, O, accumulation of metabolites in the epidermis and/or chlorophyll parenchyma of the mesophyll. M, midvein with accumulation of metabolites in ground parenchyma. P, detail of the epidermis and stem cortical parenchyma with secretion. Q, stem cortical and medullar cells with secretion. R, detail of secondary phloem of stems, with secretion in parenchyma cells. S, T, detail of secretory endodermis in the stem. The figures show positive reactions for lipophilic substances (ls), highlighted by neutral red (A, G, N, Q, T) and Sudan IV (B, H, M, S); terpenoids (te), indicated by the NADI (C, I, N, R); sesquiterpene lactones (sl), evidenced by sulphuric acid (D, J); phenolic compounds (pc) evidenced by ferric chloride (E, K, P); and flavonoids (fl) indicated by aluminum chloride (F, L, O).

**Table 2.** Histochemical reactions and respective classes of substances for secretions in leaves of species of Lychnophorinae

| Species                           | Histochemical reactions<br>Metabolic classes | Sudan IV and neutral red<br>Lipophilic substances | NADI reagent<br>Terpenoids | Sulphuric acid<br>Sesquiterpene lactones | Ferric chloride<br>Phenolic compounds | Aluminum chloride<br>Flavonoids |
|-----------------------------------|----------------------------------------------|---------------------------------------------------|----------------------------|------------------------------------------|---------------------------------------|---------------------------------|
| <i>Anteremanthus hatschbachii</i> |                                              | GT, CL, MV                                        | CL, MV                     | GT                                       | GT, CL, MV                            | GT, CL, MV                      |
| <i>Blanchetia heterotricha</i>    |                                              | GT, CL, MV                                        | GT, CL, MV                 | GT                                       | GT, EC, CL                            | GT, EC, CL                      |
| <i>Chronopappus bifrons</i>       |                                              | GT, CL, MV                                        | GT, CL, MV                 | GT, EC                                   | GT, EC, CL, MV                        | GT, EC, CL, MV                  |
| <i>Eremanthus polycephalus</i>    |                                              | GT, CL, MV                                        | GT, CL, MV                 | GT                                       | GT, EC, CL, MV                        | GT, MV                          |
| <i>Eremanthus leucodendron</i>    |                                              | GT, MV                                            | MV                         | GT                                       | CL                                    | CL                              |
| <i>Heterocoma gracilis</i>        |                                              | GT, CL, MV                                        | CL, MV                     | GT                                       | GT, EC, CL, MV                        | GT, EC, CL, MV                  |
| <i>Lychnophora diamantinana</i>   |                                              | GT, EC, CL, MV                                    | GT, EC, CL, MV             | GT, EC                                   | GT, EC, CL                            | GT, EC, CL                      |
| <i>Lychnophora granmogolensis</i> |                                              | GT, EC, CL, MV                                    | EC, CL, MV                 | GT, EC                                   | EC, CL                                | EC, CL                          |
| <i>Lychnophora santosii</i>       |                                              | GT, EC, CL, MV                                    | GT, EC, CL, MV             | GT                                       | GT, EC                                | GT, EC                          |
| <i>Lychnophora tomentosa</i>      |                                              | CL, MV                                            | CL, MV                     | –                                        | GT, EC, CL, MV                        | EC, CL, MV                      |
| <i>Lychnophora triflora</i>       |                                              | GT, CL, MV                                        | GT, EC, CL, MV             | EC                                       | GT, EC, CL                            | EC, CL                          |
| <i>Minasia scapigera</i>          |                                              | MV                                                | MV                         | GT                                       | GT, CL                                | CL                              |
| <i>Paralychnophora bicolor</i>    |                                              | GT, CL, MV                                        | GT, CL, MV                 | –                                        | EC, CL, MV                            | EC, CL, MV                      |
| <i>Piptolepis monticola</i>       |                                              | GT, CL, MV                                        | GT, CL, MV                 | GT                                       | GT, EC, CL, MV                        | GT, EC, CL, MV                  |
| <i>Prestelia eriopus</i>          |                                              | GT, EC, CL, MV                                    | GT, CL                     | –                                        | GT, EC, CL                            | GT, EC, CL                      |

CL, chlorenchymal cells; EC, epidermal cells; MV, midvein; GT, glandular trichome; '–', negative.

organ regions with positive reactions for lipophilic compounds have predominantly positive reactions to terpenoids.

The presence of metabolites was found to vary between young and fully expanded leaves, and

between the apical and middle portions of branch stems. All species evaluated share the same secretory structures and metabolic classes in young and fully expanded leaves. However, the density of glandular trichomes with secretion is noticeably higher

**Table 3.** Histochemical reactions and respective classes of substances for secretions in stems of species of Lychnophorinae

| Species                           | Histochemical reactions<br>Metabolic classes | Sudan IV and Neutral red<br>Lipophilic substances | NADI reagent<br>Terpenoids | Sulphuric acid<br>Sesquiterpene lactones | Ferric chloride<br>Phenolic compounds | Aluminum chloride<br>Flavonoids |
|-----------------------------------|----------------------------------------------|---------------------------------------------------|----------------------------|------------------------------------------|---------------------------------------|---------------------------------|
| <i>Anteremanthus hatschbachii</i> |                                              | GT, EN                                            | EN                         | GT                                       | GT                                    | GT                              |
| <i>Blanchetia heterotricha</i>    |                                              | GT, CP, MP                                        | CP, MP                     | GT                                       | GT, EC, CP                            | GT, CP                          |
| <i>Chronopappus bifrons</i>       |                                              | CP, PP, MP                                        | CP, PP, MP                 | –                                        | CP                                    | CP                              |
| <i>Eremanthus polycephalus</i>    |                                              | GT, EN, MP                                        | GT, EN, MP                 | GT                                       | GT, EC, CP, PP                        | GT, CP, PP                      |
| <i>Eremanthus leucodendron</i>    |                                              | GT, CP, MP                                        | CP, MP                     | GT                                       | EC, CP                                | CP                              |
| <i>Heterocoma gracilis</i>        |                                              | CP, PP, MP                                        | CP, PP, MP                 | EC, PP                                   | EC, CP, PP                            | CP, PP                          |
| <i>Lychnophora diamantinana</i>   |                                              | GT                                                | GT                         | GT                                       | GT, EC, CP, PP                        | GT, CP, PP                      |
| <i>Lychnophora granmogolensis</i> |                                              | GT, CP, MP                                        | GT, CP, MP                 | GT                                       | EC, CP, PP                            | CP, PP                          |
| <i>Lychnophora santosii</i>       |                                              | GT, CP, PP, MP                                    | CP, PP, MP                 | GT                                       | GT, EC, CP, PP                        | GT, CP                          |
| <i>Lychnophora tomentosa</i>      |                                              | CP                                                | CP                         | –                                        | –                                     | –                               |
| <i>Lychnophora triflora</i>       |                                              | PP, MP                                            | MP                         | –                                        | GT, EC, CP, MP                        | CP, MP                          |
| <i>Minasia scapigera</i>          |                                              | PP, MP                                            | PP, MP                     | –                                        | –                                     | –                               |
| <i>Paralychnophora bicolor</i>    |                                              | CP, PP, MP                                        | GT, EC, CP, PP, MP         | EC                                       | GT, EC, CP, PP, MP                    | CP, PP, MP                      |
| <i>Piptolepis monticola</i>       |                                              | GT, CP, PP, MP                                    | CP, PP, MP                 | GT                                       | GT, EC, CP, PP, MP                    | GT, CP, PP, MP                  |
| <i>Prestelia eriopus</i>          |                                              | PP, MP                                            | PP, MP                     | –                                        | –                                     | –                               |

EN, endodermis; EC, epidermal cells; CP, cortical parenchyma; PP, phloem parenchyma; MP, medullar parenchyma; GT, glandular trichome; '–', negative.

in the young leaves of most species (Fig. 2A) compared with expanded leaves (Fig. 2B). In *Blanchetia heterotricha* DC., *Eremanthus polycephalus* (DC.) MacLeish, *Lychnophora diamantinana* Coile & S.B.Jones and *L. santosii* H.Rob., fully expanded leaves also have abundant glandular trichomes with secretion (Fig. 2C, D). At the other secretion sites (epidermal cells and parenchymal tissues), no difference was found in the accumulation of metabolites between adult and young organs.

In regard to stems, species have glandular trichomes with secretion in apical portions of the branch stems (Fig. 2E, F), with the exception of *Minasia scapigera* H.Rob. and *Prestelia eriopus* Sch.Bip., which have stems with short internodes and no glandular trichomes. In the other species, during the

secondary thickening of the branches, the epidermis containing glandular trichomes is replaced by a secondary coating and, therefore, the terpenoids, sesquiterpene lactones and flavonoids restricted to glandular trichomes and epidermal cells cease to occur in middle portions of branches.

#### STRUCTURE OF GLANDULAR TRICHOMES

The glandular trichomes in leaves and stem branches of Lychnophorinae are capitate and biseri-ate, with a short peduncle and secretory head (Fig. 3A). The ontogenesis of glandular trichomes was studied for all species. The process is similar throughout and is illustrated in this study only for *Prestelia eriopus*. The development of glandular



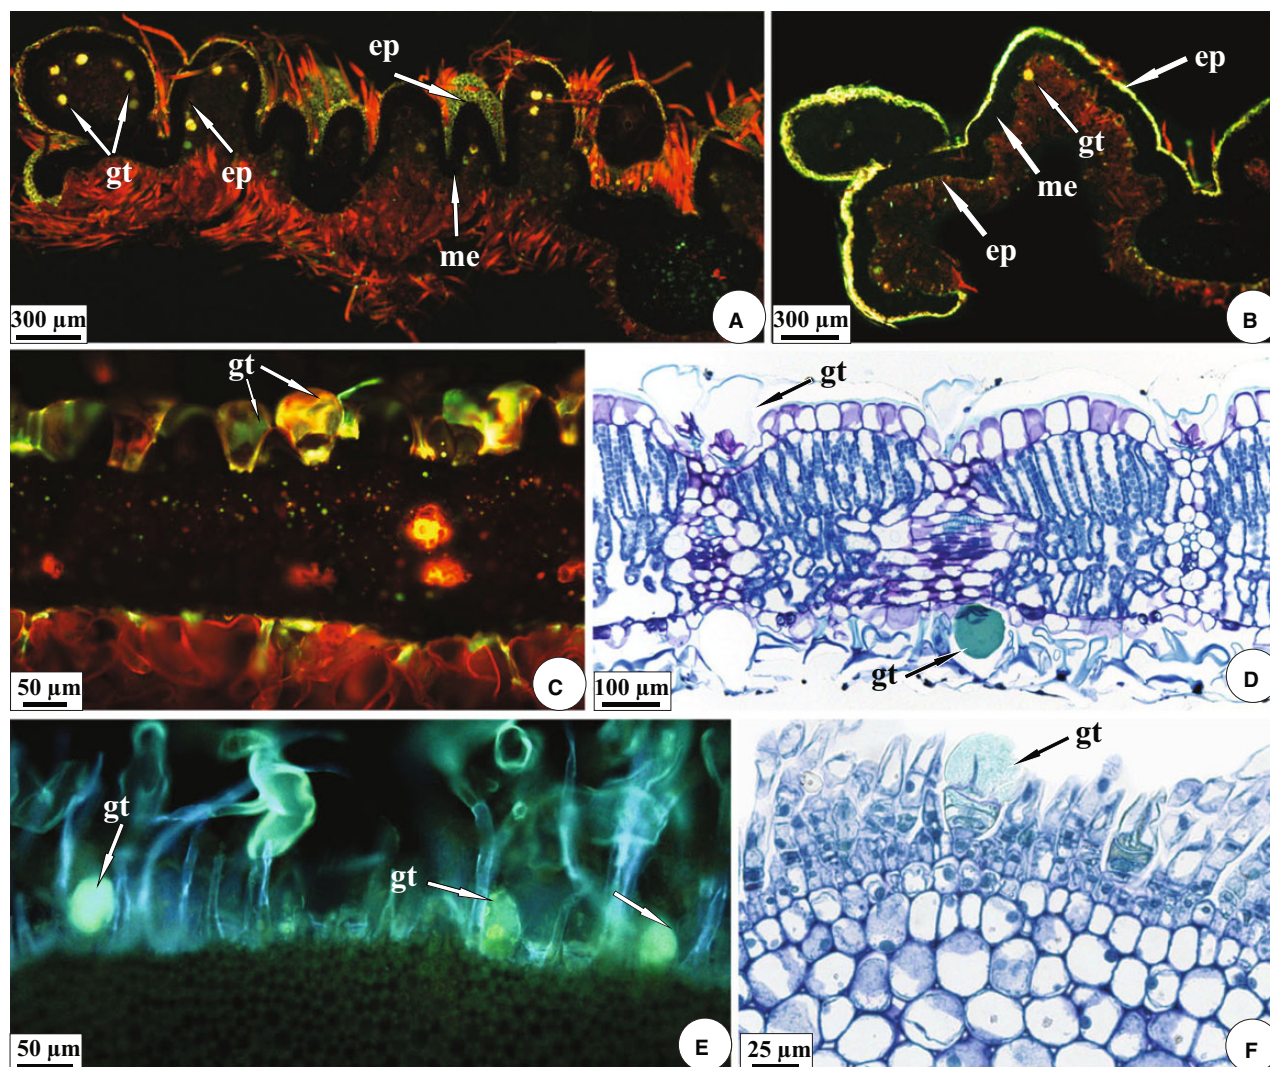

**Figure 2.** Secretory phases associated with the presence of metabolites in glandular trichomes of leaves and stems of species of Lychnophorinae. A–C, E, fluorescence microscopy (A–C, reactions with neutral red; E, reaction with aluminum chloride). D, F, light microscopy (staining with toluidine blue). A, B, leaves with wavy edges, young (A) and fully expanded (B), of *Chronopappus bifrons*. Density of trichomes with secretion is visually higher in young leaves. C, fully expanded leaf of *Lychnophora santosii* with glandular trichomes on the adaxial face. D, fully expanded leaf of *Eremanthus polycephalus* with capitate glandular trichome showing secretion on the abaxial face. E, F, surface of the apical portion of stems of *Anteremanthus hatschbachii* and *L. diamantinana* with glandular trichomes, respectively. ep, epidermis; me, mesophyll; gt, glandular trichome.

trichomes is not synchronous, i.e. trichomes at different stages are found side by side (Fig. 3A). This process begins in leaf primordia (Fig. 3B, C) and on the axes of shoot buds, and ends in young leaves (Fig. 3D) and the apical portions of branches in which meristematic tissues are no longer observed. Trichomes with secretion are found in fully expanded leaves and the middle portions of the branches, but trichomes in differentiation are never found, whereas the senescent leaves and basal and thickened

portions of the stem no longer have any glandular trichomes.

When glandular trichomes begin to develop, a protodermic cell with evident nucleus and dense cytoplasm extends anticlinally until its apical end acquires a capitated shape (Fig. 3E–G). The first division is anticlinal (Fig. 3H) and is followed by another periclinal division, originating four cells (Fig. 3I). The two basal cells differentiate into the peduncle pair and the two apical cells divide



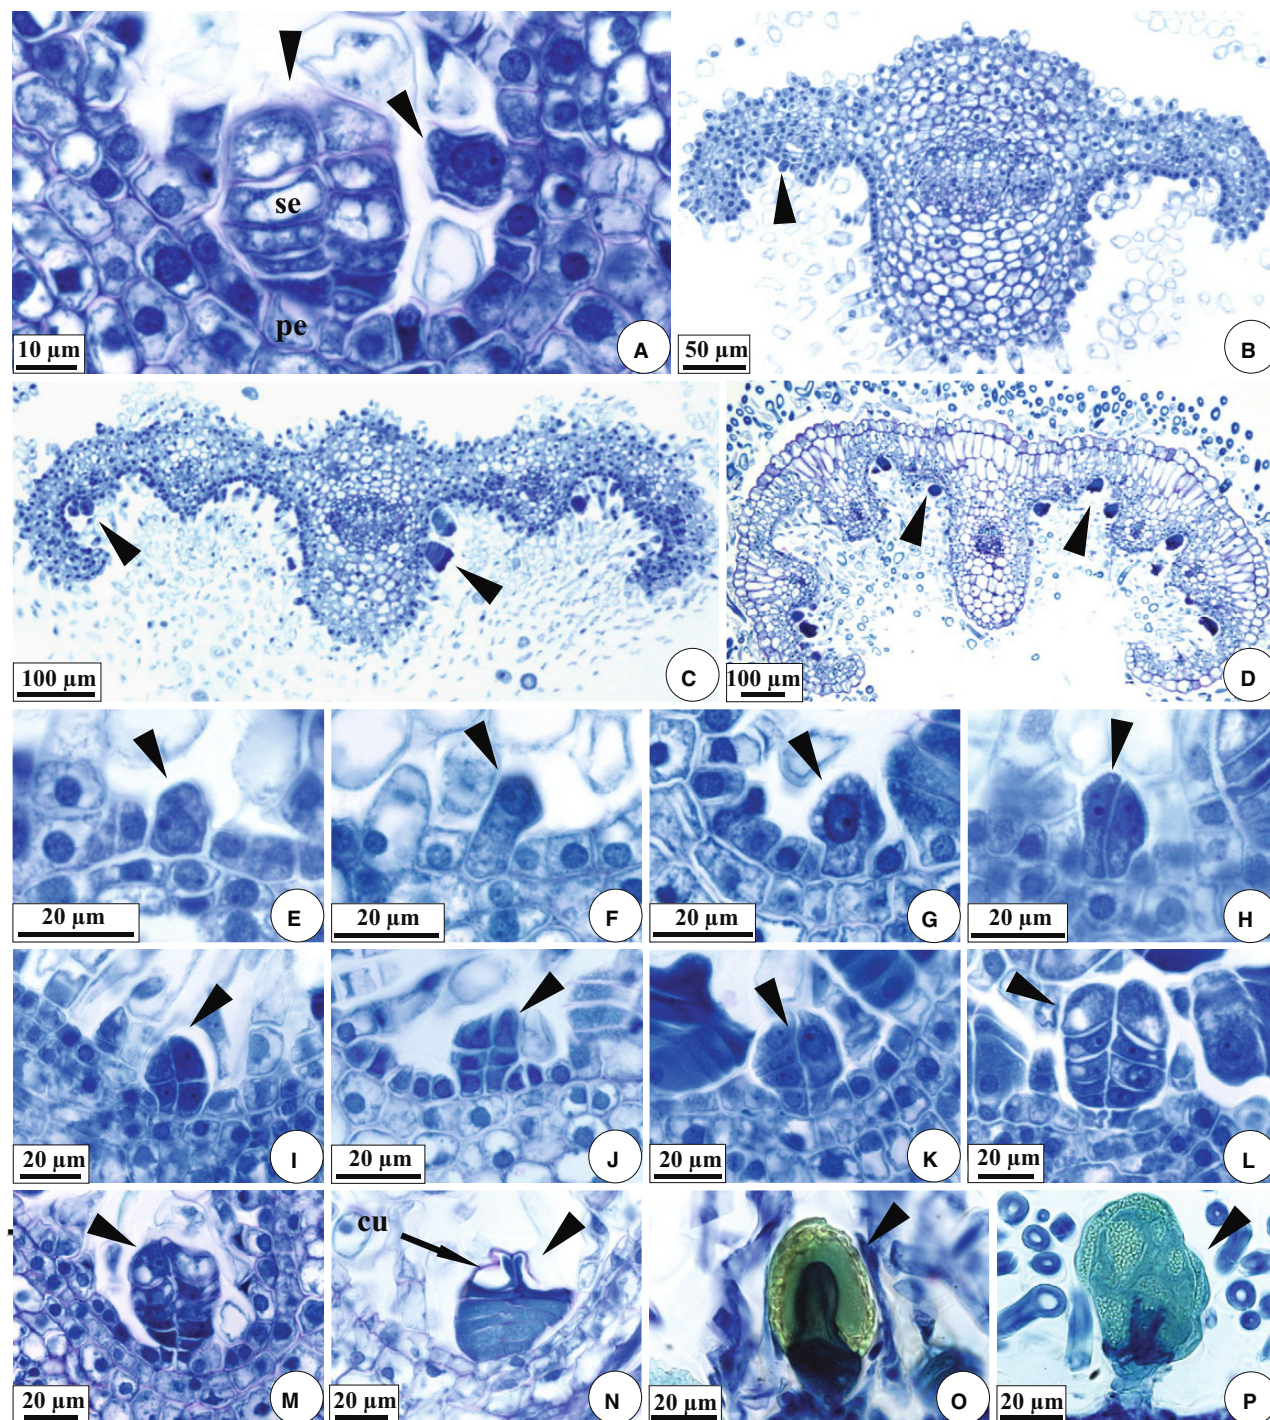

**Figure 3.** Characterization and development of capitate glandular trichomes (arrowheads) of species of Lychnophorinae. A–N, *Prestelia eriopus*. B–D, cross-sections of leaves of *P. eriopus*. O and P, glandular trichomes of *Lychnophora diamantinana*. A, trichomes at different developmental stages (arrowheads). Glandular trichome showing peduncle (pe) and secretory cells (se). B, early leaf primordium with young trichomes only. C, D, late leaf primordium (C) and young leaf (D) with trichomes at different developmental stages. E–M, ontogeny of glandular trichomes. N, glandular trichome with distended cuticle. O, P, glandular trichome with secretion in the subcuticular portion, with whole secretory cells in the early secretory phase (O) and with degenerate secretory cells, at the end of the secretion process (P).



periclinally generating four to seven pairs of secretory cells (Fig. 3J–M). When the secretion is released, the external periclinal wall of the last pair of cells retracts (Fig. 3M, N). The cuticle distends (Fig. 3N), forming the subcuticular space in which the secretion is deposited (Fig. 3O–P) until it ruptures to release the secretion. In general, the cuticle is small, thick (Fig. 3N) and ruptures easily.

Therefore, for most species examined, only a small number of glandular trichomes keep the secretions stored until the fully expanded leaf stage and in sub-apical portions of the branches. However, in the glandular trichomes of *Blanchetia heterotricha*, *Lychnophora santosii* (Fig. 2C), *Eremanthus polycephalus* (Fig. 2D) and *Lychnophora diamantinana* (Fig. 3O–P), the cuticle does not rupture easily and the secretion remains in trichomes on the fully expanded leaves, even after the degradation of the secretory cells of the trichome (Fig. 3P).

## DISCUSSION

The histochemical analyses carried out in this study on 15 species of Lychnophorinae representative of the main lineages in the group confirm the presence of chemical classes of secondary metabolites that are important chemotaxonomic markers for the subtribe (Keles *et al.*, 2010; Lusa *et al.*, 2016), including phenolic compounds, such as flavonoids, and terpenoids, such as sesquiterpene lactones.

Based on what was known of the extraction of the main classes of metabolites of Asteraceae and in particular for subtribe Heliantheae, glandular trichomes were considered the main sites of biosynthesis and accumulation of chemotaxonomic markers for the family, especially sesquiterpene lactones (Spring, Benz & Ilg, 1989; Spring, 1991; Spring *et al.*, 2001; Da Costa, Terfloth & Gasteiger, 2005; Sakamoto *et al.*, 2005; Appezzato-da-Glória *et al.*, 2012) and flavonoids (Gobbo-Neto, Gates & Lopes, 2008). For subtribe Lychnophorinae, our results confirm that leaf glandular trichomes are indeed the main sites of secretion and accumulation of sesquiterpene lactones. However, the histochemical analyses carried out in this study show that flavonoids and phenolic compounds are found mainly in the epidermal cells, chlorophyll parenchyma in leaves and fundamental parenchyma in stems. Terpenoids are found in the glandular trichomes and parenchymal tissues of stems and leaves. The presence of secretions at these sites has also been reported for widely distributed species of Asteraceae belonging to tribes Eupatorieae, Heliantheae, Mutisieae, and Vernonieae by Castro *et al.* (1997). However, the authors reported idioblasts

distributed in the epidermis, mid- and lateral veins and chlorophyll parenchyma. In this study, we did not observe idioblasts, but the metabolites were well distributed in most cells of the aforementioned tissues.

Unlike other sites at which metabolites occur, observed in most species of Lychnophorinae, the secretory endodermis is restricted to *Anteremanthus hatschbachii* Rob. and *Eremanthus polycephalus*. Although not commonly described in the literature, the secretory endodermis has already been documented in underground systems of Vernonieae by Luque *et al.* (1997), Hayashi & Appezzato-da-Glória (2005, 2007) and Cury & Appezzato-da-Glória (2009).

In all the secretory structures identified in Lychnophorinae, the secreted content can be considered mixed due to the presence of more than one class of secondary metabolites, usually accumulated at the same time. This mixed metabolite composition has already been reported in species of tribe Heliantheae (Heinrich *et al.*, 2002; Aschenbrenner, Horakh & Spring, 2013). Heinrich *et al.* (2002) observed lipophilic compounds and flavonoids in the glandular trichomes of *Sigesbeckia jorullensis* Kunth and Aschenbrenner *et al.* (2013) observed terpenoids and sesquiterpene lactones in the glandular trichomes of *Helianthus* L. This suggests that mixed secretions are common in Asteraceae.

Glandular trichomes are important biosynthesis sites in Lychnophorinae, since they are present in the leaves of all species evaluated herein and in the stems of most of them, and are responsible for the biosynthesis of all the classes of metabolite evaluated. The structure of these trichomes is similar to that of other glandular trichomes already described for Eupatorieae and Vernonieae (Monteiro *et al.*, 2001; Appezzato-da-Glória *et al.*, 2012). However, ontogenetic studies on the glandular trichomes of Lychnophorinae show that development occurs only at leaf primordia and is asynchronous, i.e. trichomes at different developmental stages are found in the same portion of the organ, which could mean that the secretion phase lasts longer. The number of secretory cells in the glandular head varies from one species to another and even within a single species. However, no relationship was observed between the number of secretory cells in the glandular head and the permanence of trichomes in adult organs.

For most of the species evaluated, the phase during which secreting trichomes are more abundant coincides with initial developmental phases of leaves and stems, which may indicate a protective role for young organs, as reported by Siebert (2004) and Machado, Gregório & Guimarães (2006), mainly related to the inhibition of herbivores and pathogens through the release of metabolite repellents (Werker,

2000). In the species *Blanchetia heterotricha*, *Eremanthus polycephalus*, *Lychnophora diamantinana* and *L. santosii*, abundant trichomes were observed with secretion in fully expanded leaves. Amrehn, Heller & Spring (2014) observed that the increase in cuticle thickness of the glandular trichome of *Helianthus annuus* L. as it develops was a prerequisite for preventing premature cuticle rupture. The retention of secretion products in the trichomes of *B. heterotricha*, *E. polycephalus*, *L. diamantinana* and *L. santosii* might be the result of cuticle resistance to rupture.

No differences were found in the epidermal cells, secretory endodermis and parenchymal tissues of leaves and stems of Lychnophorinae regarding the accumulation of metabolites when young organs were compared to developed organs, despite the fact that thickened branch stems cease to exhibit metabolites in trichomes. The presence of phenolic compounds (mainly flavonoids) in epidermis and chlorophyll parenchyma tissues is probably related to the protection of the cell mechanism against damaging solar radiation (Kofidis, Bosabalidis & Moustakas, 2003; Lusa *et al.*, 2014; Silva *et al.*, 2014). This would explain the presence of these phenolic compounds in early and developed organs exposed to intense sunlight.

## CONCLUSIONS

In this study, we found that the classes of secondary metabolites related to the main chemotaxonomic markers of Lychnophorinae are secreted and stored in glandular trichomes, epidermal cells and parenchyma tissues of leaves and stems. The glandular trichomes on the leaves are the main site of secretion and accumulation of sesquiterpene lactones. Flavonoids and other phenolic compounds are found mainly in the epidermis and chlorophyll parenchyma in the leaves and in ground parenchyma in the stems. Terpenoids are found both in glandular trichomes and in parenchyma tissues of stems and leaves. The classes of metabolites of interest located in glandular trichomes are prevalent in the early developmental stages of the organs (young leaves and young branches). However, young and expanded organs are equally rich in metabolites stored in parenchyma tissues, except for thickened portions of branches. Therefore, the information obtained in this study on the histolocalization and abundance of compounds of interest provides a basis for the selective collection of botanical material in Lychnophorinae, so that phytochemical investigations of the group can be carried out more effectively and species conservation enhanced.

## ACKNOWLEDGEMENTS

Our thanks to the IEF, MG, Brazil, for granting permission and facilities to collect plant material for this study. This work was supported by the National Council for Scientific and Technological Development (CNPq) – grants [Proc. no. 303715/2014-6] and the São Paulo Council for Research (FAPESP) – financial support [Thematic Project Proc. no. 2010/51454-3] and grants for the first author [Proc. no. 2010/02085-5].

## REFERENCES

- Abreu VGC, Correa GM, Silva TM, Fontoura HS, Cara DC, Piló-Veloso D, Alcântara AFC. 2013. Anti-inflammatory effects in muscle injury by transdermal application of gel with *Lychnophora pinaster* aerial parts using phonophoresis in rats. *BMC Complementary and Alternative Medicine* **13**: 270.
- Allwood JW, Goodacre R. 2010. An introduction to liquid chromatography-mass spectrometry instrumentation applied in plant metabolomic analyses. *Phytochemical Analysis* **21**: 33–47.
- Amrehn E, Heller A, Spring O. 2014. Capitulate glandular trichomes of *Helianthus annuus* (Asteraceae): ultrastructure and cytological development. *Protoplasma* **251**: 161–167.
- Andreucci AC, Ciccarelli D, Desideri I, Pagni AM. 2008. Glandular hairs and secretory ducts in *Matricaria chamomilla* L. (Asteraceae): morphology and histochemistry. *Annales Botanici Fennici* **45**: 11–18.
- Appezato-da-Glória B, Da Costa FB, Silva VC, Gobbo-Neto L, Rehder VLG, Hayashi AH. 2012. Glandular trichomes on aerial and underground organs in *Chrysolaena* species (Vernonieae – Asteraceae): structure, ultrastructure and chemical composition. *Flora* **207**: 878–887.
- Appezato-da-Glória B, Hayashi AH, Cury G, Soares MKM, Rocha R. 2008. Occurrence of secretory structures in underground systems of seven Asteraceae species. *Botanical Journal of the Linnean Society* **157**: 789–796.
- Ascensão L, Da Silva JAT, Barroso JG, Figueiredo AC, Pedro LG. 2001. Glandular trichomes and essential oils of *Helichrysum stoechas*. *Israel Journal of Plant Sciences* **49**: 115–122.
- Ascensão L, Pais MSS. 1987. Glandular trichomes of *Artemisia campestris* (ssp. *maritima*): ontogeny and histochemistry of the secretory product. *Botanical Gazette* **148**: 221–227.
- Aschenbrenner AK, Horakh S, Spring O. 2013. Linear glandular trichomes of *Helianthus* (Asteraceae): morphology, localization, metabolite activity and occurrence. *AoB Plants* **5**: plt028.
- Baldin ELL, Souza ES, Silva JPGF, Pavarini DP, Lopes NP, Lopes JLC, Souza GHB. 2012. Towards new botanical pesticides: the toxic effect of *Eremanthus goyazensis* (Asteraceae) leaves essential oil against *Brevipalpus*



- phoenicis* (Acari: Tenuipalpidae). *Química Nova* **35**: 2254–2257.
- Bohlmann F, Gupta RK, Jakupovic J, Robinson H, King RM. 1981.** Three germacranolides and other constituents from *Eremanthus* species. *Phytochemistry* **20**: 1609–1612.
- Bohlmann F, Jakupovic J. 1990.** Progress in the chemistry of the Vernoniae (Compositae). *Plant Systematics and Ecology* **4**(Suppl.):3–43.
- Bohlmann F, Singh P, Zdero C, Ruhe A, King RM, Robinson H. 1982.** Furanoheliangolides from two *Eremanthus* species and from *Chresta sphaerocephala*. *Phytochemistry* **21**: 1669–1673.
- Bohlmann F, Zdero C, King RM, Robinson H. 1980a.** Sesquiterpene lactones from *Eremanthus* species. *Phytochemistry* **19**: 2663–2668.
- Bohlmann F, Zdero C, King RM, Robinson H. 1980b.** Seven guaianolides from the tribe Vernoniae. *Phytochemistry* **19**: 2669–2673.
- Borella JC, Lopes JLC, Leitão Filho HF, Semir J, Díaz JG, Herz W. 1992.** Eudesmanolides and 15-deoxygoyazensolide from *Lychnophora pseudovillosissima*. *Phytochemistry* **31**: 692–695.
- Borella JC, Lopes JLC, Vichnewski W, Cunha WR, Herz W. 1998.** Sesquiterpene lactones, triterpenes and flavones from *Lychnophora ericoides* and *Lychnophora pseudovillosissima*. *Biochemical Systematics and Ecology* **26**: 671–676.
- Camilotti JG, Biu CC, Farago PV, Pereira dos Santos VL, Franco CRC, Budel JM. 2014.** Anatomical characters of leaf and stem of *Calea serrata* Less., Asteraceae. *Brazilian Archives of Biology and Technology* **57**: 867–873.
- Carlquist S. 1958.** Structure and ontogeny of glandular trichomes of Madinae (Compositae). *American Journal of Botany* **45**: 675–682.
- Castro MM, Leitão Filho HF, Monteiro WR. 1997.** Utilização de estruturas secretoras na identificação dos gêneros de Asteraceae de uma vegetação de Cerrado. *Revista Brasileira de Botânica* **20**: 163–174.
- Chagas-Paula D, Oliveira TB, Zhang T, Edrada-Ebel R, Da Costa FB. 2015.** Prediction of anti-inflammatory plants and discovery of their biomarkers by machine learning algorithms and metabolomic studies. *Planta Medica* **81**: 450–458.
- Charrière-Ladreix Y. 1976.** Repartition intracellulaire du sécrétat flavonique de *Populus nigra* L. *Planta* **129**: 167–174.
- Cury G, Appezzato-da-Glória B. 2009.** Internal secretory spaces in thickened underground systems of Asteraceae species. *Australian Journal of Botany* **57**: 229–239.
- Da Costa FB, Terfloth L, Gasteiger J. 2005.** Sesquiterpene lactone-based classification of three Asteraceae tribes: a study based on self-organizing neural networks applied to chemo systematics. *Phytochemistry* **66**: 345–353.
- David R, Carde J. 1964.** Histochemie - coloration différentielle des inclusions lipidiques et terpeniques des pseudophylles du pin maritime au moyen du reactif NADI. *Comptes Rendus Hebdomadaires Des Seances De L'Académie Des Sciences* **258**: 1338–1340.
- De Souza MR, De Paula CA, De Resende MLP, Grabe-Guimarães A, Souza Filho JD, Saúde-Guimarães DA. 2012.** Pharmacological basis for use of *Lychnophora trichocarpha* in gouty arthritis: anti-hyperuricemic and anti-inflammatory effects of its extract, fraction and constituents. *Journal of Ethnopharmacology* **142**: 845–850.
- Dias Barros DA, Callegari Lopes JL, Vichnewski W, Callegari Lopes JN, Kulanthaivel P, Herz W. 1985.** Sesquiterpene lactones in the molluscidal extract of *Eremanthus glomerulatus*. *Planta Medica* **51**: 38–39.
- Dos Santos MD, Chen G, Almeida MC, Soares DM, Souza GEPD, Lopes NP, Lantz RC. 2010.** Effects of caffeoylquinic acid derivatives and C-flavonoid from *Lychnophora ericoides* on *in vitro* inflammatory mediator production. *Natural Product Communications* **5**: 733–740.
- Dos Santos MD, Gobbo-Neto L, Albarella L, de Souza GEP, Lopes NP. 2005.** Analgesic activity of di-caffeoylquinic acids from roots of *Lychnophora ericoides* (Arnica da serra). *Journal of Ethnopharmacology* **96**: 545–549.
- Eisenreich W, Bacher A. 2007.** Advances of high-resolution NMR techniques in the structural and metabolic analysis of plant biochemistry. *Phytochemistry* **68**: 2799–2815.
- Favi F, Cantrell CL, Mebrahtu T, Kraemer ME. 2008.** Leaf peltate glandular trichomes of *Vernonia galamensis* ssp. *galamensis* var. *ethiopica* Gilbert: development, ultrastructure, and chemical composition. *International Journal of Plant Sciences* **169**: 605–614.
- Figueiredo AC, Pais MS. 1994.** Ultrastructural aspects of the glandular cells from the secretory trichomes and from the cell suspension cultures of *Achillea millefolium* L. ssp. *millefolium*. *Annals of Botany* **74**: 179–190.
- Geissman TA, Griffin TS. 1971.** Sesquiterpene lactones: acid-catalyzed color reactions as an aid in structure determination. *Phytochemistry* **10**: 2475–2485.
- Gobbo-Neto L, Gates PJ, Lopes NP. 2008.** Negative ion ‘chip-based’ nanospray tandem mass spectrometry for the analysis of flavonoids in glandular trichomes of *Lychnophora ericoides* Mart. (Asteraceae). *Rapid Communications in Mass Spectrometry* **22**: 3802–3808.
- Gouvea DR, Ribeiro ABB, Thormann U, Lopes NP, Butterweck V. 2014.** Evaluation of intestinal permeability of vicenin-2 and lychnopholic acid from *Lychnophora salicifolia* (brazilian arnicão) using caco-2 cells. *Journal of Natural Products* **77**: 464–471.
- Grael CFF, Vichnewski W, Souza GEPD, Lopes JLC, Albuquerque S, Cunha WR. 2000.** A study of the trypanocidal and analgesic properties from *Lychnophora grammongolense* (Duarte) Semir & Leitão Filho. *Phytotherapy Research* **14**: 203–206.
- Hayashi AH, Appezzato-da-Glória B. 2005.** The origin and anatomy of rhizophores in *Vernonia herbacea* and *V. platensis* (Asteraceae) from the Brazilian Cerrado. *Australian Journal of Botany* **53**: 273–279.
- Hayashi AH, Appezzato-da-Glória B. 2007.** Anatomy of the underground system in *Vernonia grandiflora* Less. and *V. brevifolia* Less. (Asteraceae). *Brazilian Archives of Biology and Technology* **50**: 979–988.

- Heinrich G, Pfeifhofer HW, Stabentheiner E, Sawidis T. 2002.** Glandular hairs of *Sigesbeckia jorullensis* Kunth (Asteraceae): morphology, histochemistry and composition of essential oil. *Annals of Botany* **89**: 459–469.
- Herz W, Kumar N, Vichnewski W, Blount JF. 1980.** Cytotoxic sesquiterpene lactones of *Eremanthus incanus* and *Heterocoma albida*. Crystal structure and stereochemistry of eregoyazin. *Journal of Organic Chemistry* **45**: 2503–2506.
- Jensen WA. 1962.** *Botanical histochemistry: principle and practice*. San Francisco: W. H. Freeman.
- Johansen D. 1940.** *Plant microtechnique*. New York: McGraw-Hill Book Co. Inc.
- Kanashiro A, Kabeya LM, Graef CF, Jordão CO, Azzolini AE, Lopes JLC, Lucisano-Valim YM. 2006.** Sesquiterpene lactones from *Lychnophora pohlii*: neutrophil chemiluminescence inhibition and free radical scavenger activity. *Journal of Pharmacy and Pharmacology* **58**: 853–858.
- Karnovsky MJ. 1965.** A Formaldehyde-glutaraldehyde fixative of high osmolality for use in electron microscopy. *Journal of Cell Biology* **27**: 137a–138a.
- Keeley SC, Robinson H. 2009.** Vernoniae. In: Funk VA, Susanna A, Stuessy TF, Bayer RJ, eds. *Systematics, evolution and biogeography of Compositae*. Vienna: IAPT, 439–469.
- Keles LC, Melo NI, Aguiar GP, Wakabayashi KAL, Carvalho CE, Cunha WR, Crotti AEM, Lopes JLC, Lopes NP. 2010.** Lychnophorinae (Asteraceae): a survey of its chemical constituents and biological activities. *Química Nova* **33**: 2245.
- Kirk PW. 1970.** Neutral red as a lipid fluorochrome. *Stain Technology* **45**: 1–4.
- Kofidis G, Bosabalidis A, Moustakas M. 2003.** Contemporary seasonal and altitudinal variations of leaf structural features in oregano (*Origanum vulgare* L.). *Annals of Botany* **92**: 635–645.
- Lestern NR, Curtis JD. 1985.** Distribution and anatomy of hydathodes in Asteraceae. *Botanical Gazette* **146**: 106–114.
- Loeuille B, Keeley SC, Pirani JR. 2015b.** Systematics and evolution of syncephaly in American Vernoniae (Asteraceae) with emphasis on the Brazilian subtribe Lychnophorinae. *Systematic Botany* **40**: 286–298.
- Loeuille B, Semir J, Lohmann LG, Pirani JR. 2015a.** A phylogenetic analysis of Lychnophorinae (Asteraceae: Vernoniae) based on molecular and morphological data. *Systematic Botany* **40**: 299–315.
- Lunardello MA, Tomaz JC, Vichnewski W, Lopes JLC, Gutierrez AB, Díaz JG, Herz W. 1995.** Sesquiterpene lactones and flavonoids from *Eremanthus mattogrossensis* and *Eremanthus eriopus*. *Journal of the Brazilian Chemical Society* **6**: 307–311.
- Luque R, Menezes NL. 2003.** Estructura primaria del tallo de *Lychnophora* Mart. (Vernoniae: Asteraceae). *Plantula* **3**: 117–128.
- Luque R, Menezes NL, Semir J. 1997.** La función secretora de la endodermis de la raíz de especies de *Lychnophora* Mart. (Asteraceae). *Plantula* **1**: 221–228.
- Luque R, Menezes NL, Semir J. 1999.** Anatomía foliar de *Lychnophora* Mart. (Vernoniae: Asteraceae). *Plantula* **2**: 141–152.
- Lusa MG, Appezzato-da-Glória B, Loeuille B, Bartoli G, Ciccarelli D. 2014.** Functional groups in Lychnophorinae (Asteraceae: Vernoniae) based on morphological and anatomical traits. *Australian Journal of Botany* **62**: 150–163.
- Lusa MG, Cardoso EC, Machado SR, Appezzato-da-Glória B. 2015.** Trichomes related to an unusual method of water retention and protection of the stem apex in an arid zone perennial species. *AOB Plants* **7**: plu088.
- Lusa MG, Martucci MEP, Loeuille BFP, Gobbo-Neto L, Appezzato-da-Glória B, Da Costa FB. 2016.** Characterization and evolution of secondary metabolites in Brazilian Vernoniae (Asteraceae) assessed by LC-MS fingerprinting. *Botanical Journal of the Linnean Society* doi: 10.1111/boj.12480.
- Machado SR, Gregório EA, Guimarães E. 2006.** Ovary peltate trichomes of *Zeyheria Montana* (Bignoniaceae): developmental ultrastructure and secretion in relation to function. *Annals of Botany* **97**: 357–369.
- Marston A. 2007.** Role of advances in chromatographic techniques in phytochemistry. *Phytochemistry* **68**: 2786–2798.
- Metcalfe CR, Chalk L. 1950.** *Anatomy of the dicotyledons*. Oxford: Clarendon Press.
- Monteiro WR, Castro MM, Mazzoni-Viveiros SC, Mahlberg PG. 2001.** Development and some histochemical aspects of foliar glandular trichomes of *Stevia rebaudiana* (Bert.) Bert. Asteraceae. *Brazilian Journal of Botany* **24**: 349–357.
- Nakajima JN, Dematteis M, Loeuille B, et al. 2013.** Asteraceae. In: Martinelli G, Moraes MA, eds. *Livro vermelho da flora do Brasil*. Rio de Janeiro: Instituto de Pesquisas Jardim Botânico do Rio de Janeiro, 203–286.
- Nakajima JN, Teles AM, Ritter M, Mondin CA, Dematteis M, Heiden G, Borges XB, Rivera VL, Bringer JBA Jr, Saavedra M, de Cássia-Araújo-Pereira R, Sales-de-Melo MRC. 2009.** Asteraceae. In: Giulietti AM, ed. *Plantas raras do Brasil: conservação internacional*. Belo Horizonte: Universidade Estadual de Feira de Santana, 76–89.
- Oliveira AB, Saúde DA, Perry KSP, Duarte DS, Raslan DS, Boaventura MAD, Chiari E. 1996.** Trypanocidal sesquiterpenes from *Lychnophora* species. *Phytotherapy Research* **10**: 292–295.
- Sacilotto ACBC, Sartori FT, Vichnewski W. 2002.** Chemical constituents of *Eremanthus veadeiroensis* (Asteraceae). *Biochemical Systematics and Ecology* **30**: 897–900.
- Sakai WS. 1973.** Simple method for differential staining of paraffin embedded plant material using toluidine blue O. *Stain Technology* **48**: 247–249.
- Sakamoto HT, Flausino D, Castellano EE, Stark CBW, Gates PJ, Lopes NP. 2003.** Sesquiterpene lactones from *Lychnophora ericoides*. *Journal of Natural Products* **66**: 693–695.
- Sakamoto HT, Gobbo-Neto L, Cavalheiro AJ, Lopes NP, Lopes JLC. 2005.** Quantitative HPLC analysis of sesquiterpene lactones and determination of chemotypes in



- Eremanthus seidelii* MacLeish & Schumacher (Asteraceae). *Journal of the Brazilian Chemical Society* **16**: 1396–1401.
- Sakamoto HT, Laudares EP, Crotti AEM, Lopes NP, Vichnewski W, Lopes JLC, Heleno VCG. 2010.** Sesquiterpenes lactones and flavonoids from *Eremanthus argenteus*. *Natural Product Communications* **5**: 681–684.
- Sartori FT, Sacilotto ACBC, Lopes JLC, Lopes NP, Vichnewski W. 2002.** Phytochemical study of *Lychnophora markgravii* (Asteraceae). *Biochemical Systematics and Ecology* **30**: 609–612.
- Saúde-Guimarães DA, Raslan DS, Oliveira AB. 2014.** *In vitro* antitumor activity of sesquiterpene lactones from *Lychnophora trichocarpha*. *Revista Brasileira de Plantas Medicinais* **16**: 275–282.
- Siebert DJ. 2004.** Localization of salvinin A and related compounds in glandular trichomes of the psychoactive sage, *Salvia divinorum*. *Annals of Botany* **93**: 763–771.
- Silva DB, Turatti ICC, Gouveia DR, Ernst M, Teixeira SP, Lopes NP. 2014.** Mass spectrometry of flavonoid vicenin-2, based sunlight barriers in *Lychnophora* species. *Scientific Reports* **4**: 1–8.
- Silvério MS, Del-Vechio-Vieira G, Pinto MAO, Alves MS, Souza OV. 2013.** Chemical composition and biological activities of essential oils of *Eremanthus erythropappus* (DC) McLeish (Asteraceae). *Molecules* **18**: 9785–9796.
- Silvério MS, Sousa OV, Del-Vechio-Vieira G, Miranda MA, Matheus FC, Kaplan MA. 2008.** Propriedades farmacológicas do extrato etanólico de *Eremanthus erythropappus* (DC.) McLeish (Asteraceae). *Revista Brasileira de Farmacognosia* **18**: 430–435.
- Souza JPBS, Tomaz JC, Silva CCP, Ellena J, Lopes NP, Lopes JLC. 2012.** Novel sesquiterpene lactones from *Eremanthus seidelii*. *Tetrahedron Letters* **53**: 6339–6342.
- Spring O. 1991.** Trichome microsampling of sesquiterpene lactones for the use of systematic studies. *Recent Advances in Phytochemistry* **25**: 319–345.
- Spring O, Benz T, Ilg M. 1989.** Sesquiterpene lactones of the capitate glandular trichomes of *Helianthus annuus*. *Phytochemistry* **28**: 745–749.
- Spring O, Zipper R, Reeb S, Vogler B, Da Costa FB. 2001.** Sesquiterpene lactones and a myoinositol from glandular trichomes of *Viguiera quinqueremis* (Heliantheae; Asteraceae). *Phytochemistry* **57**: 267–272.
- Sumner LW, Mendes P, Dixon RA. 2003.** Plant metabolomics: large-scale phytochemistry in the functional genomics era. *Phytochemistry* **62**: 817–836.
- Taleb-Contini SH, Santos WF, Mortari MR, Lopes NP, Lopes JL. 2008.** Neuropharmacological effects in mice of *Lychnophora* species (Vernonieae, Asteraceae) and anti-convulsant activity of 4,5-di-O-[E]-caffeoylquinic acid isolated from the stem of *L. rupestris* and *L. staavioides*. *Basic & Clinical Pharmacology & Toxicology* **102**: 281–286.
- Vichnewski W, Gilbert B. 1972.** Schistosomicidal sesquiterpene lactone from *Eremanthus elaeagnus*. *Phytochemistry* **11**: 2563–2566.
- Vichnewski W, Sarti SJ, Gilbert B, Herz W. 1976.** Goyazensolide, a schistosomicidal heliangolide from *Eremanthus goyazensis*. *Phytochemistry* **15**: 191–193.
- Vichnewski W, Skrochy CA, Nasi AMTT, Lopes JLC, Herz W. 1999.** 15-hydroxyeremantholide B and derivatives from *Eremanthus arboreus*. *Phytochemistry* **50**: 317–320.
- Werker E. 2000.** Trichome diversity and development. *Advances in Botanical Research* **31**: 1–35.
- Werker E, Fahn A. 1981.** Secretory hairs of *Inula viscosa* (L.) Ait. – development, ultrastructure, and secretion. *Botanical Gazette* **142**: 461–476.
- Zdero C, Bohlmann F, Robinsons H, King RM. 1981.** Germacranolides from *Proteopsis argentea*. *Phytochemistry* **20**: 739–741.
